# Supplementary material for: Sialidase-catalyzed transsialylation using polymer-supported solution-phase techniques
Source: Royal Society of Chemistry journal article supplement (doi:10.1039/b003943h), 2000-01-01
Supplement: b003943h.doc [file b003943h.doc]

**Preparation of acceptors**.

**[MPEG] [DOX]yl 4-*O*-**-D-galactopyranoside** (**2**). 2,3,4,6-tetra-*O*-acetyl-**-D-galactopyranosyl trichloroacetimidate (495 mg, 1 mmol), MPEG-DOX-OH (2.6 g, 0.54 mmol) and molecular sieve (MS 3 Å, 1 g) are dissolved in dry dichloromethane under argon atmosphere. The mixture is stirred for 1 hour at room temperature, then cooled to 0°C. After addition of trimethylsilyltrifluoromethane sulfonate (TMSOTf, 96 µl, 0.54 mmol) the mixture is stirred for 45 minutes. Diisopropylethylamine (85 µl) is added to the solution. The mixture is stirred for a further 10 minutes. To precipitate the polymer an excess of tert-butyl methyl ether (100 ml) is added. The polymer is filtered, rinsed and recrystallized from hot dry ethanol (75 ml). Deprotection using 1,8-diazabicyclo[5.4.0]undec-7-ene (DBU) in methanol afforded **2** (2.43 g, 84%).

**[MPEG] [DOX]yl 4-*O*-[**-D-galactopyranosyl]-2-acetamido-2-deoxy-**-D-glucopyrano-side** (**3**). In the first step the acceptor precursor [MPEG] [DOX]yl 4-*O*-[2,3,4,6-tetra-*O*-acetyl-**-D-galactopyranosyl]-2-acetamido-2-deoxy-3,4,6-tri-*O*-acetyl-**-D-glucopyranoside was syn-thesized from 4-*O*-[2,3,4,6-tetra-*O*-acetyl-**-D-galactopyranosyl]-2-acetamido-2-deoxy-3,4,6-tri-*O*-acetyl-**-D-glucopyranosyl chloride (650 mg, 1 mmol) and MPEG-DOX-OH (2.6 g, 0.5 mmol) employing the conditions described for the synthesis of **1**.11 Deacetylation using 1,8-diazabicyclo[5.4.0]undec-7-ene (DBU) in methanol afforded **3** (2.22 g, 81%).

**[MPEG] [DOX]yl 4-*O*-[**-D-galactopyranosyl]-**-D-glucopyranoside** (**4**). 4-*O*-[2,3,4,6-tetra-*O*-acetyl-**-D-galactopyranosyl]-2,3,4,6-tetra-*O*-acetyl-**-D-glucopyranosyl trichloro-acetimidate (938 mg, 1.2 mmol), MPEG-DOX-OH (3.1 g, 0.6 mmol) and molecular sieve (MS 3 Å, 1 g) are dissolved in dry dichloromethane under argon atmosphere. The mixture is stirred for 1 hour at room temperature, then cooled to –20°C. After addition of trimethylsilyltrifluoromethane sulfonate (TMSOTf, 108 µl, 0.6 mmol) the mixture is stirred for 6 hours. Diisopropylethylamine (100µl) is added to the solution. The mixture is stirred for a further 10 minutes. To precipitate the polymer an excess of *tert*-butyl methyl ether (180 ml) is added. The polymer is filtered, rinsed and recrystallized from hot dry ethanol (150 ml). Deacetylation using 1,8-diazabicyclo[5.4.0]undec-7-ene (DBU) in methanol afforded **4** (2.49 g, 76%).

**Transsialylation assay using *Vibrio cholerae* sialidase.**

Solutions of *p*Np-Neu5Ac (21 mg, 50 µmol) and acceptor (120-160 mg, 25 µmol, donor / acceptor ratio 2 : 1) in degassed incubation buffer (150 µl, 0.1 M NaOAc, 0.5 mM CaCl2, pH 5.5) are incubated with *Vibrio cholerae*sialidase (1 U) at 30°C.

Compounds **5** (24 mg, 17 %), **7** (21 mg, 15 %), **9** (17 mg, 12 %) and **11** (22 mg, 16 %) were obtained as white powders. The amounts refer to the calculated absolute amounts of polymer bound product whereas the percentages are relative to polymer bound acceptor units.

**Transsialylation assay using *Salmonella typhimurium* sialidase.**

Solutions of *p*Np-Neu5Ac (21 mg, 50 µmol) and acceptor (110-150 mg, 20 µmol, donor / acceptor ratio 2.5 : 1) in degassed incubation buffer (150 µl, 0.1 M NaOAc, pH 5.1) are incubated with *Salmonella typhimurium* sialidase (1 U) at 30°C.

Compounds **6** (34 mg, 24 %)**, 8** (23 mg, 16 %)**, 10** (21 mg, 14 %) and **12** (23 mg, 15 %) were obtained as amorphous solids. The amounts refer to the calculated absolute amounts of polymer bound product whereas the percentages are relative to polymer bound acceptor units.

**General procedure.** The course of the reaction is followed photometrically at 400 nm and by tlc (ethanol / 1 M ammonium acetate (pH 7.4) 5 : 1) using resorcinol spraying reagent for N‑acetylneuraminic acid detection. The incubation is terminated by addition of 0.1 M Na2CO3 (1 ml)followed by ultrasonification for 3 minutes. The mixture is acidified to pH 6.8 with Dowex 50WX8 H+ cation exchanger and centrifuged. The supernatant is decanted and codestilled twice with toluene (10 ml). The residue is taken up in dry dichloromethane (10 ml) and precipitated with *tert*-butylmethylether (200 ml). The precipitate is filtered, rinsed with *tert*-butylmethylether (50 ml) and recrystallized from ethanol.

**Cleavage of the product from the resin** exemplified for compound **3**.

160 mg of polymer bound trisaccharide **11** (0.032 mmol) is dissolved in dry dichloromethane (1.5 ml). Acetic anhydride (1.5 ml) and scandium (III) trifluoromethanesulfonate [Sc(OTf)3, 10 mg, 0.02 mmol] are added sequentially. After stirring under argon for 6 hours the mixture is cooled to 0°C in an ice bath and *tert*-butylmethylether (150 ml) is added to precipitate the cleaved polymer. The filtrate is concentrated to dryness. The residue is suspended in dry methanol (10 ml), and 100 mg cation exchange resin (DOWEX 50W-X8 H+) is added. After stirring for 6 hours at room temperature the resin is filtered off. The filtrate is concentrated and purified by flash chromatography (petrol ether / ethyl acetate 3:1 to 1:1) to yield *p*-*O*-acetyl-[DOX]yl [methyl (5-acetamido-4,7,8,9-tetra-*O*-acetyl-3,5-dideoxy-D-*glycero*-D-*galacto*-2-nonulopyranosyl)onate]-(2-3)-*O*-(2,3,4-tri-*O*-acetyl--D-galactopyranosyl)-(1-4)-*O*-2,3,6-tri-*O*-acetyl-**-D-glucopyranoside (1.8 mg, 14% relative to polymer bound **4,** 88% relative to **11**).
